# Supplementary material for: Anamnese und klinische Untersuchung in der Notfall- und Intensivmedizin
Source: Springer Nature journal article supplement (doi:10.1007/s00063-020-00731-x), 2020-09-03
Supplement: MOESM1 [file 18344968]

## Zusatzmaterial

### Leitsymptom-basiertes, strukturiertes Anamneseschema am Beispiel „respiratorische Insuffizienz“

- | <b>Ja</b>                | <b>Nein</b>              | <b>Plötzlicher (innerhalb von Sekunden) Beginn der Dyspnoe?</b>                                                                                                                                          |
|--------------------------|--------------------------|----------------------------------------------------------------------------------------------------------------------------------------------------------------------------------------------------------|
| <input type="checkbox"/> | <input type="checkbox"/> | <i>wenn ja</i> , erwäge Lungenembolie, Pneumothorax, Anaphylaxie, Inhalation eines Fremdkörpers, rhythmogenes Herzversagen, Trauma                                                                       |
| <b>Ja</b>                | <b>Nein</b>              | <b>Assoziation mit anderen Symptomen?</b>                                                                                                                                                                |
| <input type="checkbox"/> | <input type="checkbox"/> | Brustschmerz<br><i>wenn ja</i> , erwäge myokardiale Ischämie, Lungenembolie, Pneumothorax, Trauma, respiratorische Infektion/ Pleuritis                                                                  |
| <input type="checkbox"/> | <input type="checkbox"/> | Palpitationen<br><i>wenn ja</i> , erwäge rhythmogenes Herzversagen                                                                                                                                       |
| <input type="checkbox"/> | <input type="checkbox"/> | paroxysmale nächtliche Dyspnoe, Nykturie, Gewichtszunahme, bilaterale Beinödeme, Müdigkeit<br><i>wenn ja</i> , erwäge akut-auf-chronisches Herzversagen                                                  |
| <input type="checkbox"/> | <input type="checkbox"/> | Bein-/ Knöchelschwellung<br><i>wenn einseitig</i> , erwäge Lungenembolie; <i>wenn beidseitig</i> , erwäge akut-auf-chronisches Herzversagen, Flüssigkeitsüberladung/ Hypervolämie                        |
| <input type="checkbox"/> | <input type="checkbox"/> | obstruktive Atmung<br><i>wenn ja</i> , erwäge Asthma/ COPD, Herzversagen, Flüssigkeitsüberladung/ Hypervolämie                                                                                           |
| <input type="checkbox"/> | <input type="checkbox"/> | Fieber, Schüttelfrost<br><i>wenn ja</i> , erwäge (respiratorische) Infektion und/ oder Sepsis                                                                                                            |
| <input type="checkbox"/> | <input type="checkbox"/> | produktiver Husten, missfarbenes Sputum<br><i>wenn ja</i> , erwäge respiratorische Infektion                                                                                                             |
| <input type="checkbox"/> | <input type="checkbox"/> | Fieber, Gewichtsverlust, Nachtschweiß<br><i>wenn ja</i> , erwäge Tuberkulose, respiratorische Infektion infolge einer hämatologischen Malignität                                                         |
| <input type="checkbox"/> | <input type="checkbox"/> | Hämoptyse<br><i>wenn ja</i> , erwäge Blutung aus Lungentumor, Gefäßmalformation, respiratorische Infektion (Tuberkulose, Pneumokokkenpneumonie). Bronchiektase, Lungenembolie, diffuse alveoläre Blutung |

- | <b>Ja</b>                | <b>Nein</b>              | <b>Symptomerleichterung durch Änderung der Körperposition?</b>                                                    |
|--------------------------|--------------------------|-------------------------------------------------------------------------------------------------------------------|
| <input type="checkbox"/> | <input type="checkbox"/> | Orthopnoe<br><i>wenn ja, erwäge Herzversagen, Flüssigkeitsüberladung/ Hypervolämie, respiratorische Infektion</i> |
| <input type="checkbox"/> | <input type="checkbox"/> | sitzende Position mit (auf die Knie) aufgestützten Armen<br><i>wenn ja, erwäge COPD/ Asthma</i>                   |
| <input type="checkbox"/> | <input type="checkbox"/> | Trepopnoe<br><i>wenn ja, erwäge Herzversagen, einseitige Lungenerkrankung (z.B. Pleuraerguss)</i>                 |
| <input type="checkbox"/> | <input type="checkbox"/> | Platypnoe<br><i>wenn ja, erwäge basale Pneumonie oder Lungenemphysem, hepatopulmonales Syndrom</i>                |

- | <b>Ja</b>                | <b>Nein</b>              | <b>Vorerkrankungen?</b>                                                                                                                                                           |
|--------------------------|--------------------------|-----------------------------------------------------------------------------------------------------------------------------------------------------------------------------------|
| <input type="checkbox"/> | <input type="checkbox"/> | chronisches Lungen-, Herz- oder Niereninsuffizienz<br><i>wenn ja, erwäge Exazerbation der Grunderkrankung</i>                                                                     |
| <input type="checkbox"/> | <input type="checkbox"/> | Malignom<br><i>wenn ja, erwäge Pleuraerguss, respiratorische Infektion, Lungenembolie, Lungenmetastasen, Strahlen-induzierter Lungenschaden</i>                                   |
| <input type="checkbox"/> | <input type="checkbox"/> | Allergie/ Atopie<br><i>wenn ja, erwäge Asthma, Anaphylaxie</i>                                                                                                                    |
| <input type="checkbox"/> | <input type="checkbox"/> | Z.n. Beinvenenthrombose oder Lungenembolie<br><i>wenn ja, erwäge Lungenembolie</i>                                                                                                |
| <input type="checkbox"/> | <input type="checkbox"/> | rezente respiratorische Infektion<br><i>wenn ja, erwäge protrahierte oder neue respiratorische Infektion</i>                                                                      |
| <input type="checkbox"/> | <input type="checkbox"/> | rezentes Thoraxtrauma<br><i>wenn ja, erwäge muskuloskelettale Verletzung, Lungenkontusion, Pneumo- oder Hämatothorax</i>                                                          |
| <input type="checkbox"/> | <input type="checkbox"/> | HIV Infektion<br><i>wenn ja, erwäge respiratorische Infektion (inkl. Tuberkulose und Pneumozystis Infektion) und/ oder Pneumothorax (insbesondere bei Pneumozystis Infektion)</i> |

**Ja      Nein      Medikamentenanamnese?**

- kurz- oder längerfristige Einnahme von einem oder mehreren der folgenden Medikamente: Amiodaron, Bleomycin, Mitomycin C, all-trans Retinoinsäure, Cytarabin, Amphotericin, Carbamazepin, Azathioprin, Methotrexat, Phenytoin, Busulfan, Taxane, Gold, Taxan-beihaltende Medikamente/ Implantate (inkl. Stents)  
*wenn ja, erwäge Medikamenten- induzierte Lungenschädigung*

**Ja      Nein      Berufliche Tätigkeit?**

- Staubexposition (z.B. Asbest, Kohle, Quarzstaub, etc.)  
*wenn ja, erwäge sekundäre pulmonale Fibrose oder respiratorische Infektion (inkl. Tuberkulose bei Quarzstaubexposition)*

**Ja      Nein      Sozialanamnese?**

- Raucher  
*wenn ja, erwäge COPD, respiratorische Infektion, Herzinsuffizienz, Lungenkarzinom oder Pneumothorax*
- übermäßiger Alkoholkonsum  
*wenn ja, erwäge respiratorische Infektion oder Aspirationspneumonie*

**Ja      Nein      Familienanamnese**

- Allergie/ Atopie  
*wenn ja, erwäge Asthma*
- Asthma  
*wenn ja, erwäge Asthma*
- genetisch-bedingte Lungenerkrankungen (z.B. zystische Fibrose, Alpha1-Antitrypsin-Mangel)  
*wenn ja, erwäge genetisch bedingte Lungenerkrankung*
- Tuberkuloseinfektion  
*wenn ja, erwäge Tuberkulose*
